# Supplementary material
Source: PubMed Central journal article supplement (PMC6992526)

**Figure S1**

**A**

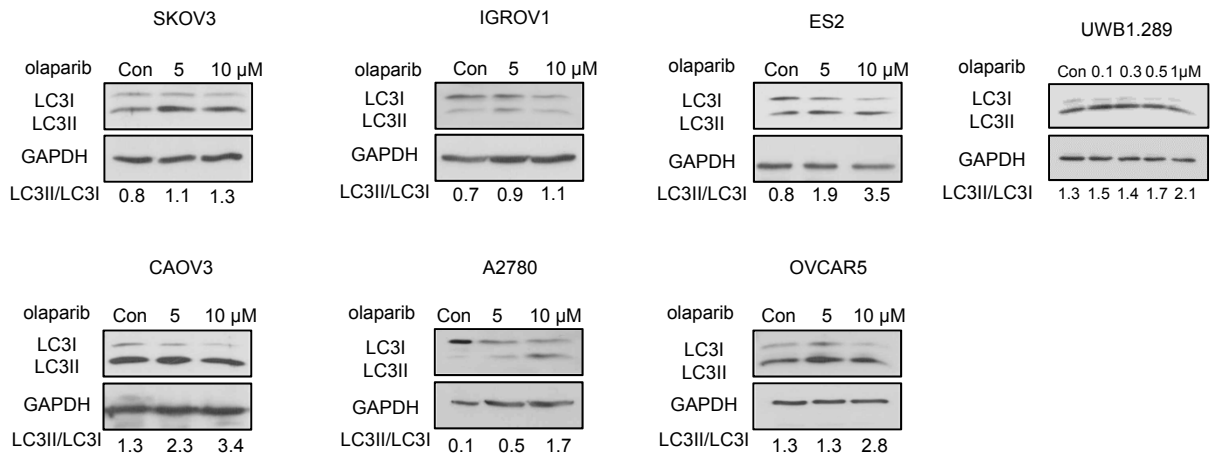

**B**

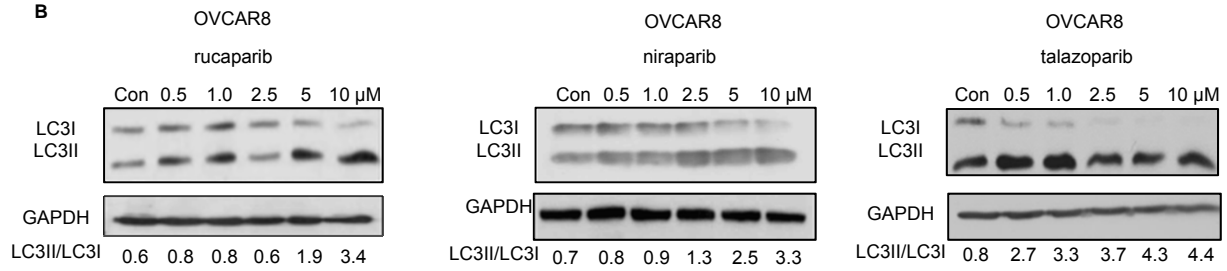

**C**

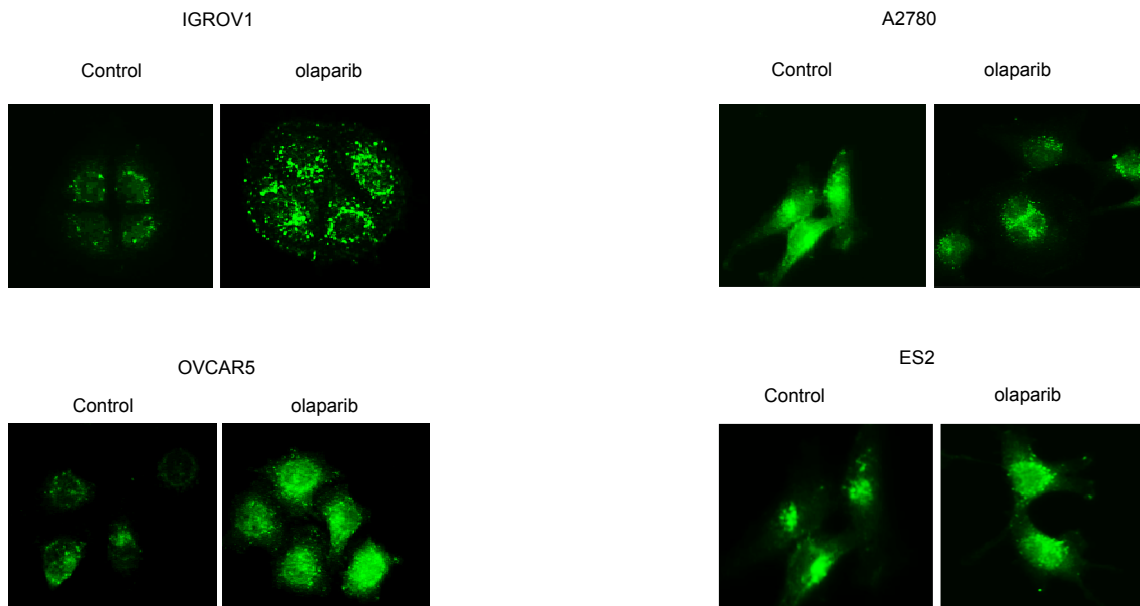

**Figure S2**

**A**

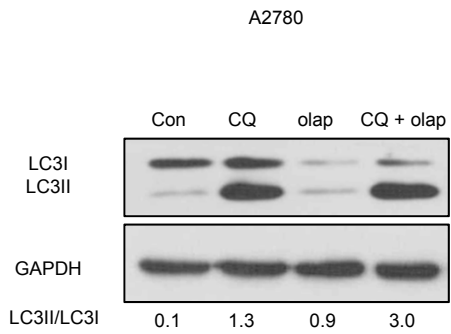

**B**

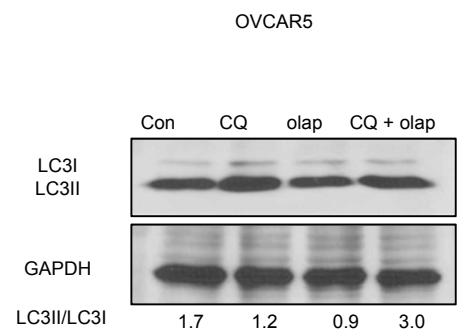

**C**

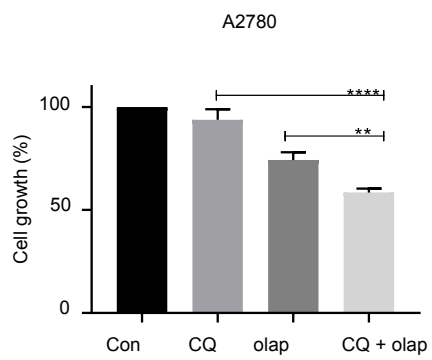

**D**

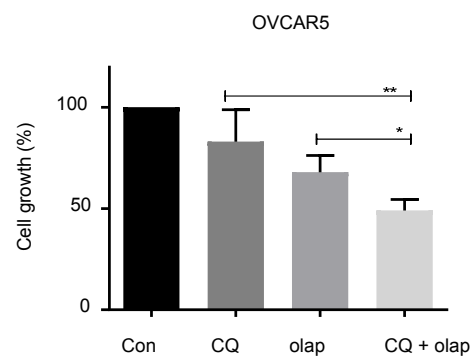

**E**

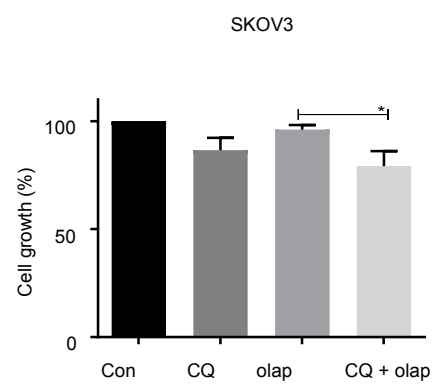

**F**

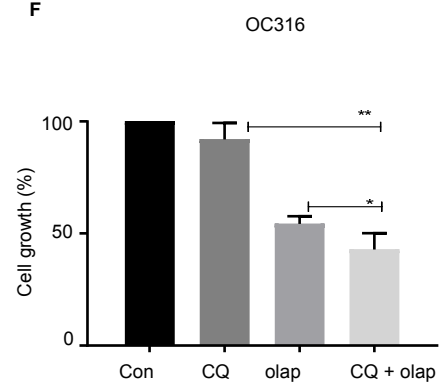

**Figure S3**

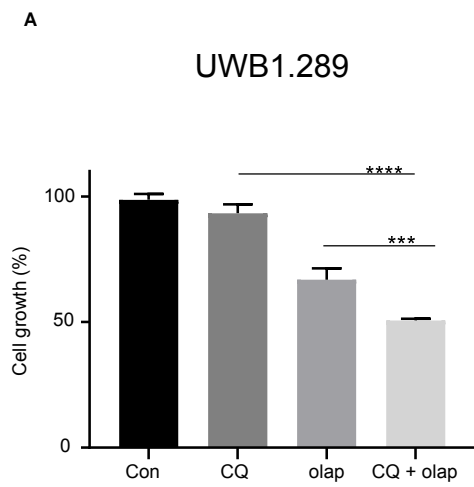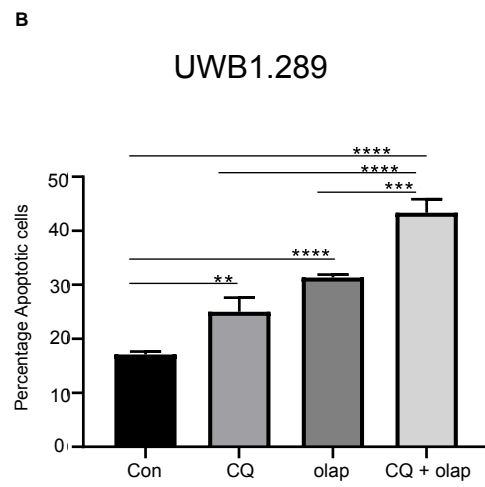

**Figure S4**

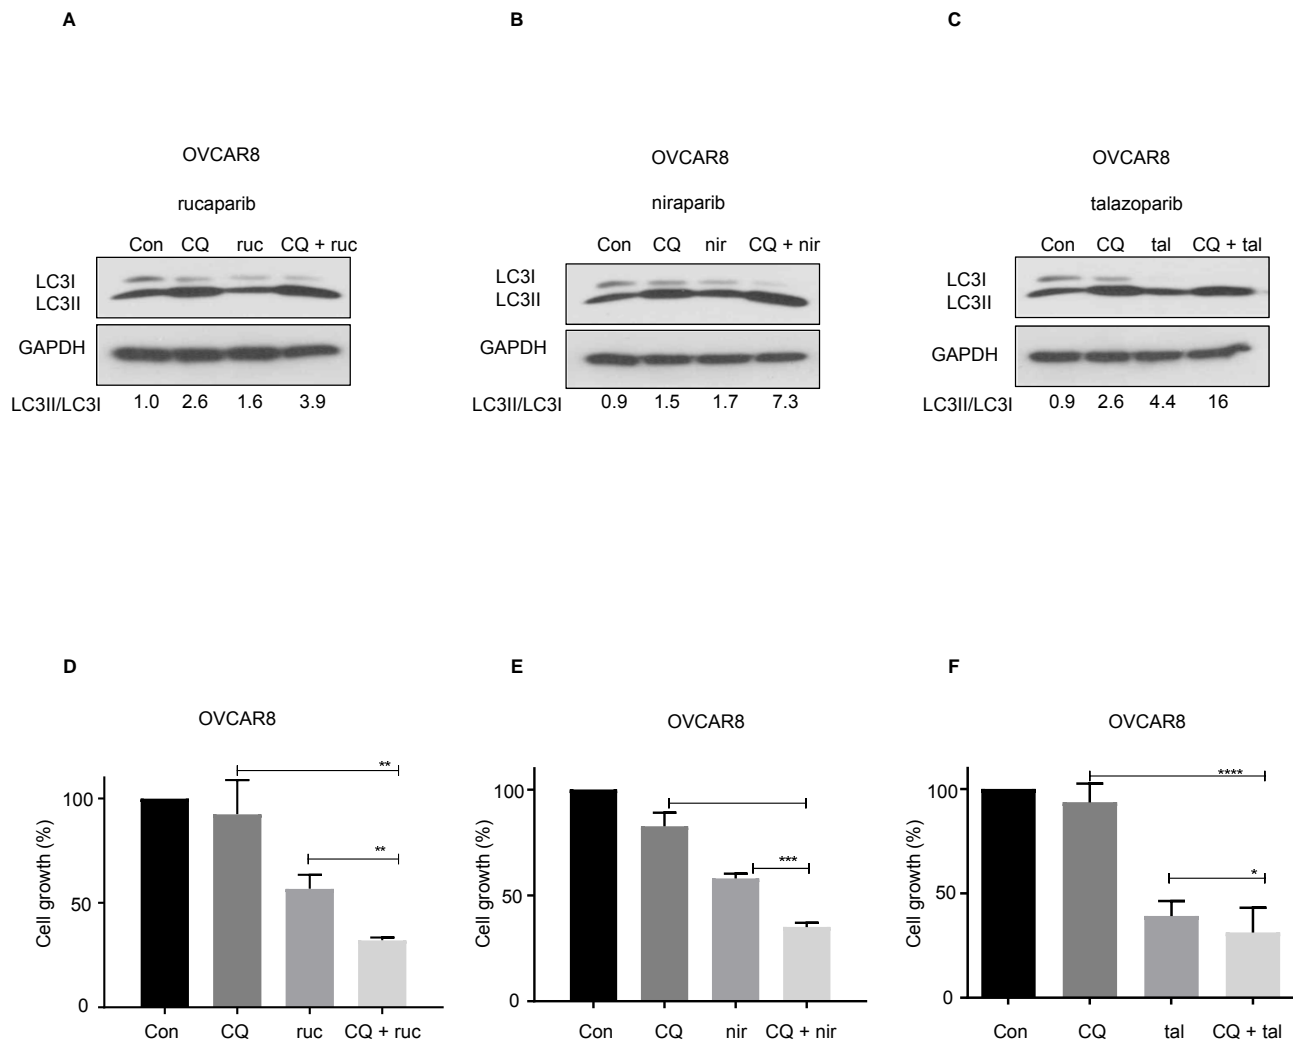

**Figure S5**

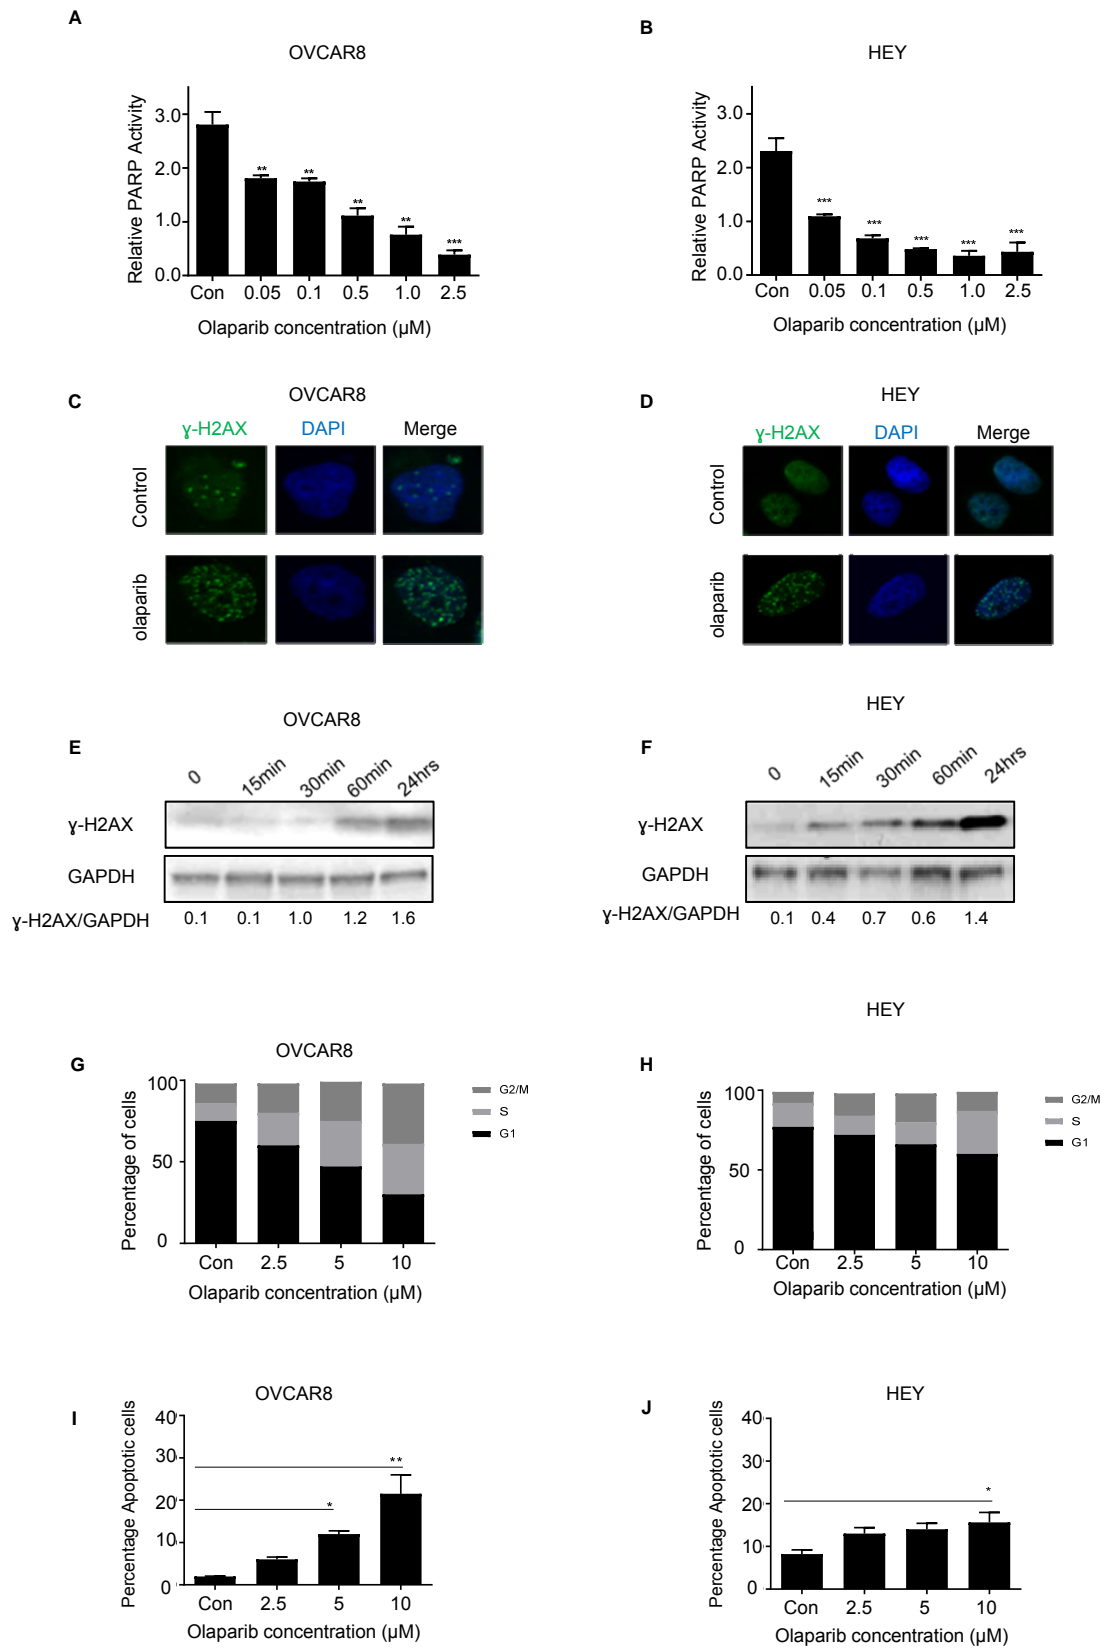

**Figure S6**

A

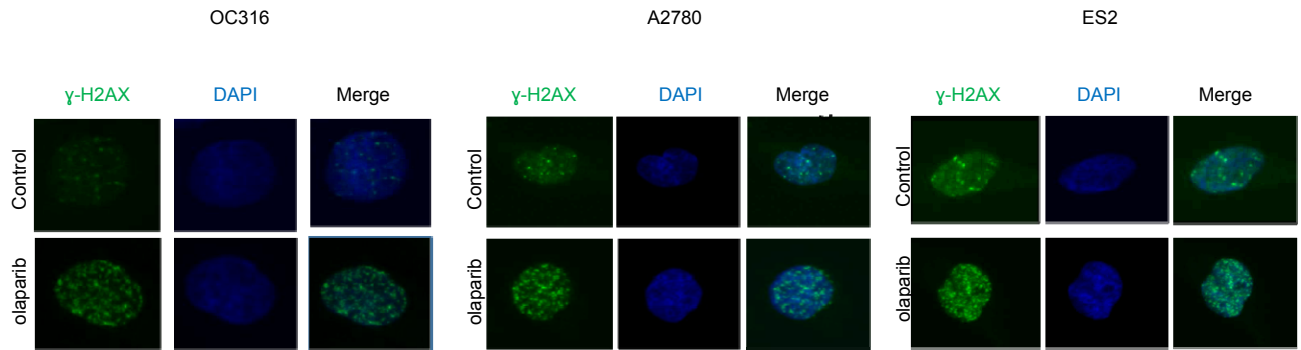

B

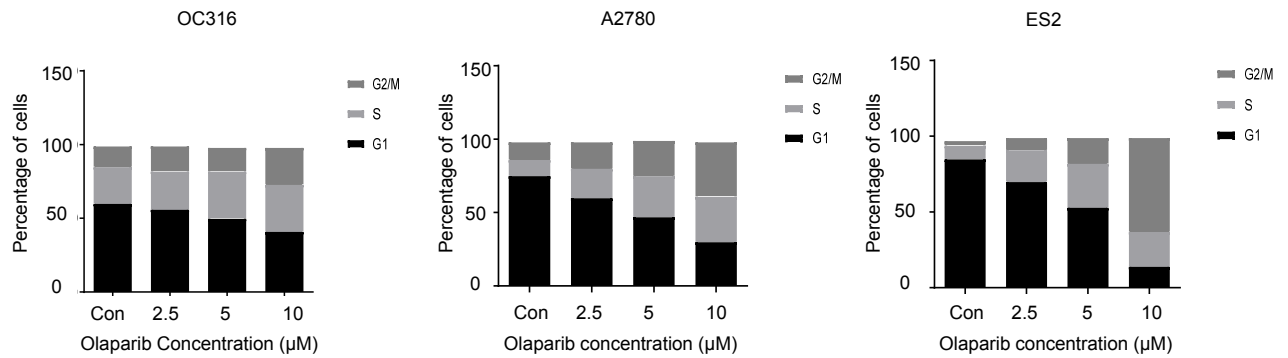

C

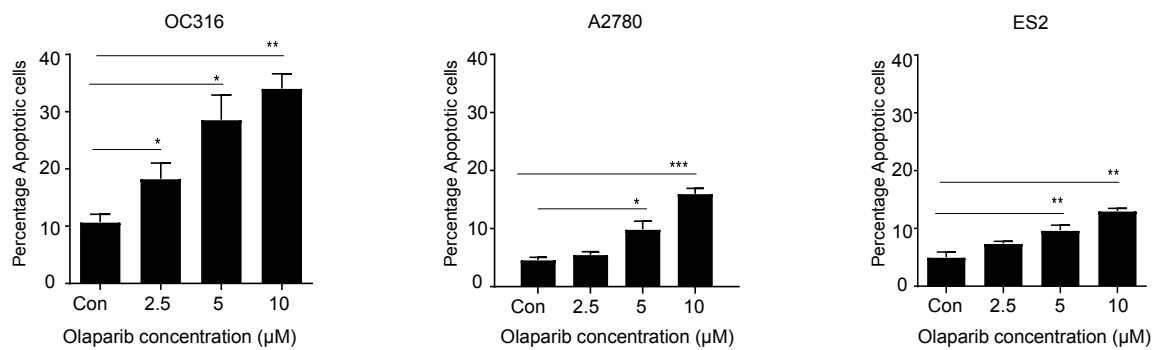

**Figure S7**

**OVCAR8  
Control**

**Table 1.**

| Kinase\Control     | Phosphorylation Site | Membrane Coordinates |
|--------------------|----------------------|----------------------|
| Reference          |                      | Spot A-A1,A2         |
| p38a               | T180/Y182            | A-A3,A4              |
| ERK1/2             | T202/Y204/T185/Y187  | A-A5,A6              |
| JNK                | T183/Y185,T221/Y223  | A-A7,A8              |
| GSK-3a/β           | S21/S9               | A-A9,A10             |
| p53                | S392                 | B-A13,A14            |
| Reference Spot     |                      | B-A17,A18            |
| EGFR               | Y1086                | A-B3,B4              |
| MSK1/2             | S376/S360            | A-B5,B6              |
| AMPKa1             | T183/Y185,T221/Y223  | A-B7,B8              |
| <b>AKT</b>         | <b>S473</b>          | <b>A-B9,B10</b>      |
| AKT                | T308                 | B-B11,B12            |
| p53                | S46                  | B-B13,B14            |
| <b>mTOR</b>        | <b>S2448</b>         | <b>A-C1,C2</b>       |
| CREB               | S133                 | A-C3,C4              |
| HSP27              | S78/S82              | A-C5,C6              |
| AMPKa2             | T172                 | A-C7,C8              |
| β-catenin          |                      | A-C9,C10             |
| p70S6 kinase       | T389                 | B-C11,C12            |
| p53                | S15                  | B-C13,C14            |
| c-jun              | S63                  | B-C15,C16            |
| Src                | Y419                 | A-D1,D2              |
| Lyn                | Y397                 | A-D3,D4              |
| Lck                | Y349                 | A-D5,D6              |
| STAT2              | Y698                 | A-D7,D8              |
| STAT5a             | Y694                 | A-D9,D10             |
| p70S6 kinase       | T421/S424            | B-D11-D12            |
| RSK1/2/3           | S380/S386/S377       | B-D13,D14            |
| Enos               | S1177                | B-D15,D16            |
| Fyn                | Y420                 | A-E1,E2              |
| Yes                | Y426                 | A-E3,E4              |
| Fgr                | Y412                 | A-E5,E6              |
| STAT6              | Y641                 | A-E7,E8              |
| STAT5b             | Y699                 | A-E9,E10             |
| STAT3              | Y705                 | B-E11,E12            |
| p27                | T198                 | B-E13,E14            |
| PLC-γ1             | Y783                 | B-E15,E16            |
| Hck                | Y411                 | A-F1,F2              |
| Chk-2              | T68                  | A-F3,F4              |
| FAK                | Y397                 | A-F5,F6              |
| PDGF Rβ            | Y751                 | A-F7,F8              |
| STAT5a/b           | Y694/Y699            | A-F9,F10             |
| STAT3              | S727                 | B-F11,F12            |
| WNK1               | T60                  | B-F13,F14            |
| PYK2               | Y402                 | B-F15,F16            |
| Reference Spot     |                      | A-G1,G2              |
| <b>PRAS40</b>      | <b>T246</b>          | <b>A-G3,G4</b>       |
| PBS(Negative Ctrl) |                      | A-G9,G10             |
| HSP60              |                      | B-G11,G12            |
| PBS(Negative Ctrl) |                      | B-G17,G18            |

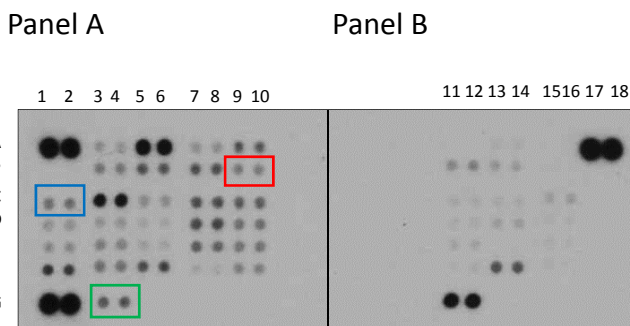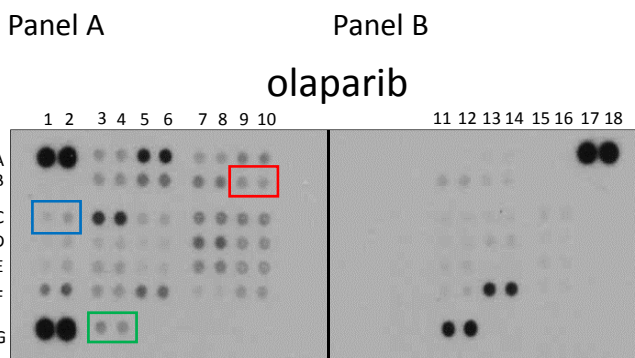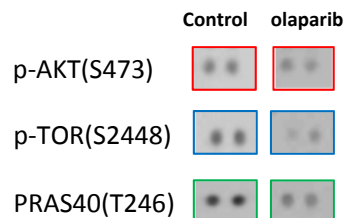

**Figure S8**

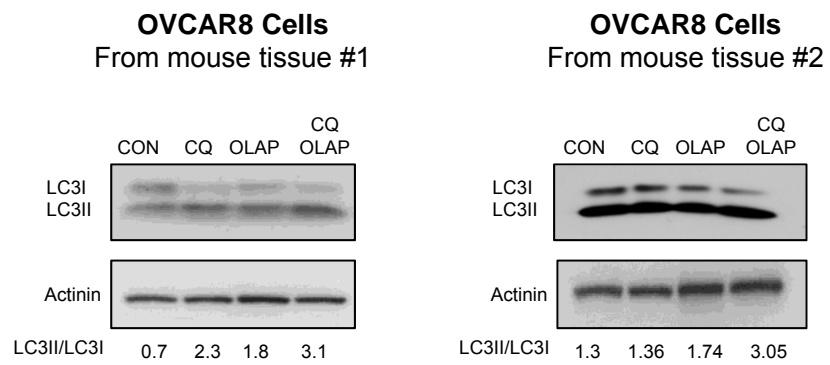



Figure S9

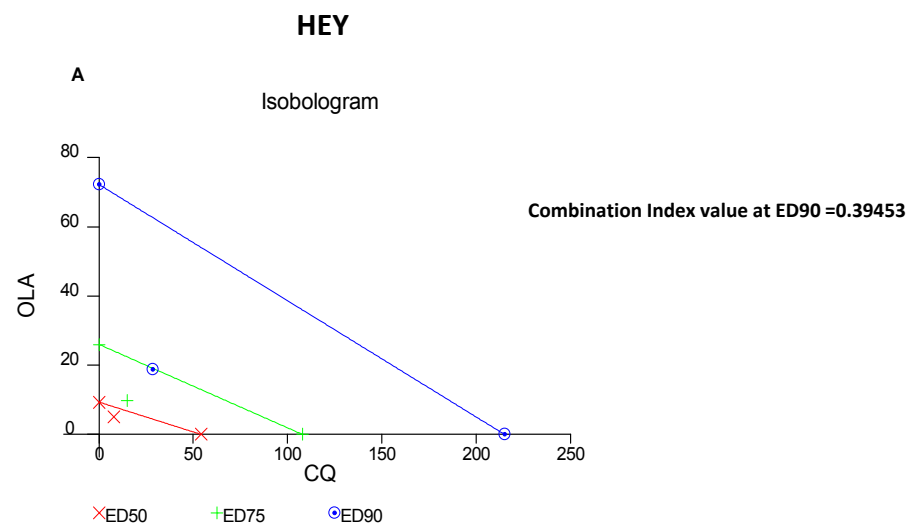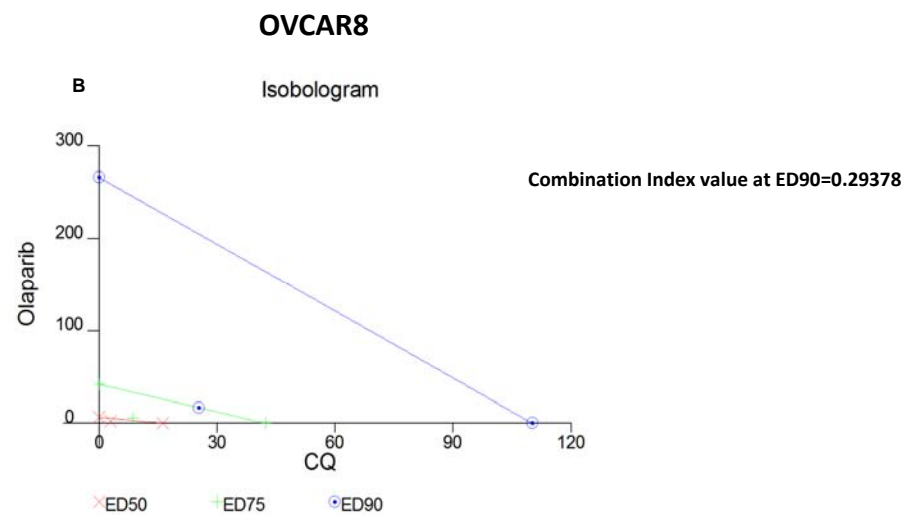

Supplement: NIHMS1055159-supplement-Supp_figS1-9.pdf [file NIHMS1055159-supplement-Supp_figS1-9.pdf]
